# Supplementary material for: Efficient Delivery of DNA Using Lipid Nanoparticles
Source: MDPI journal article supplement (doi:10.3390/pharmaceutics14081698), 2022-08-15
Supplement: s1 [file s1]

### Supplementary Materials

**Table S1.** Size, zeta-potential, polydispersity index (PDI), and encapsulation efficiency of LNP<sub>5</sub>, LNP<sub>10</sub> and LNP<sub>20</sub>.

|                                     | LNP <sub>5</sub> | LNP <sub>10</sub> | LNP <sub>20</sub> |
|-------------------------------------|------------------|-------------------|-------------------|
| <b>Size (d.nm)</b>                  | 451.9 ± 364.1    | 122.6 ± 4.095     | 129.2 ± 3.39      |
| <b>PdI</b>                          | 0.994 ± 0.011    | 0.124 ± 0.002     | 0.268 ± 0.007     |
| <b>Zeta potential (mV)</b>          | 11.11 ± 8.8      | 47.4 ± 7.55       | 49.4 ± 4.7        |
| <b>Encapsulation Efficiency (%)</b> | n.d.             | 80.3              | 67.4              |

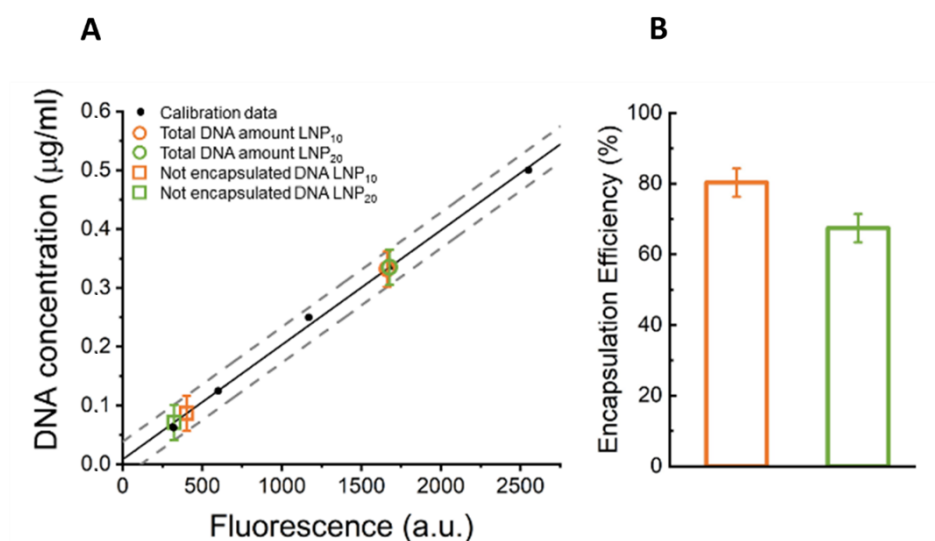

**Figure S1.** (A) Calibration curve (black points) obtained through fluorescence signal measurement of pDNA and the related fluorescence signals obtained from LNP<sub>10</sub> and LNP<sub>20</sub> before and after treatment with Triton X-100 for measuring non-encapsulated pDNA and total pDNA amounts. (B) Encapsulation efficiency of pDNA within LNP<sub>10</sub> and LNP<sub>20</sub> calculated as reported in the Materials and Methods section.

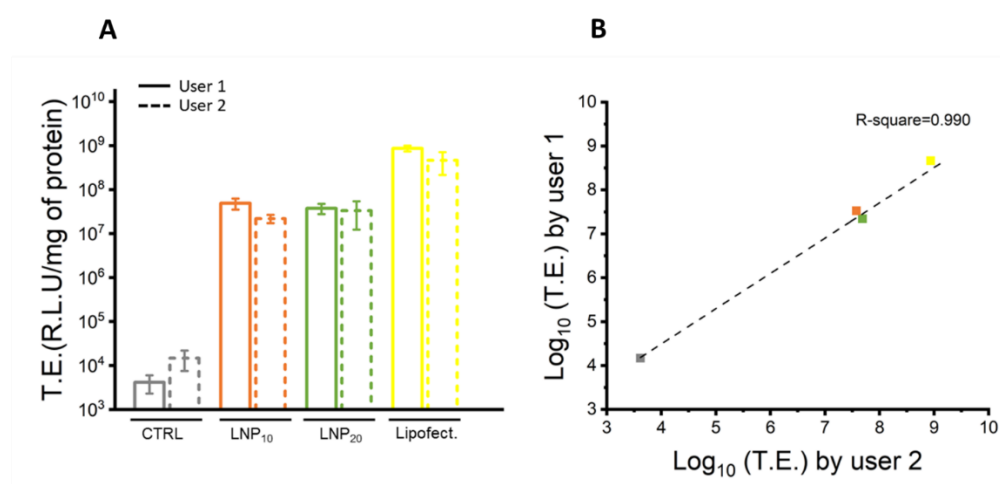

**Figure S2.** (A) Transfection efficiency (TE) of LNP<sub>10</sub>, LNP<sub>20</sub>, and Lipofectamine™3000 was measured by two users (indicated as “User 1” and “User 2”) in independent experiments. (B) High reproducibility of transfection data was demonstrated by linear regression of measured TE values.

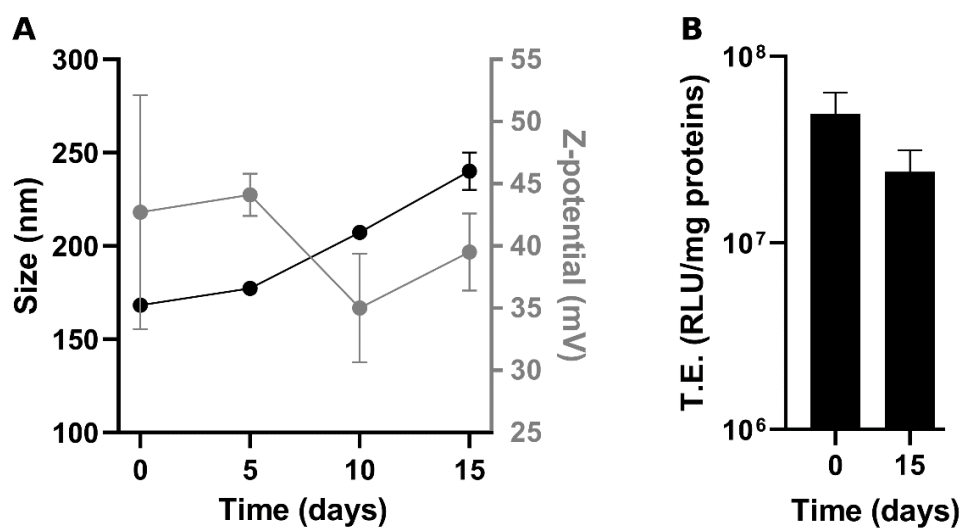

**Figure S3.** (A) Size (black) and Z-potential (grey) of LNP<sub>10</sub> measured at different time points (0, 5, 10, and 15 days). (B) Transfection efficiency (TE) of LNP<sub>10</sub> on HEK-293 cells measured at 0 and 15 days expressed as relative light units (RLU) per mg of proteins. .
